# Supplementary material
Source: publisher figshare collection journal article supplement (https://frontiersin.figshare.com/ndownloader/files/30761488)
Supplement: Supplementary file 1 [file 30761488]

## Sheet: Table S1
	Unit	Sample	Extracted	A	V	c = A / l*e	n VOP in OE
			(g rock)	(574 nm)	(mL)	(umol/L)	(nmol)
	Masirah Bay	OMR027	10.0689	0	0.5	0	0
	Masirah Bay	OMR009	10.4518	0.122	1	7.72152	7.72152
	Masirah Bay	OMR015	17.4645	0.458	0.5	28.9873	14.4937
	Masirah Bay	OMR016	20.0231	0	1.5	0	0
	Shuram	OMR008	20.009	0.278	2	17.5949	35.1899
	Shuram	OMR010	16.0008	0	3	0	0
	Shuram	OMR018	10.0008	0.374	1	23.6709	23.6709
	Shuram	OMR019	20.0073	0.346	1	21.8987	21.8987
	Shuram	OMR026	9.9654	0.306	1	19.3671	19.3671
	Shuram	OMR001	5.0903	0.257	0.5	16.2658	8.13291
	Buah	OMR002	13.0001	0.37	2.5	23.4177	58.5443
	Buah	OMR017	13.0011	0.239	2.5	15.1266	37.8165
	Buah	OMR020	10.8376			0	0
	U Shale	OMR005	2.7088	0.288	1.5	18.2278	27.3418
	U Shale	OMR006	5.1868	0.271	3	17.1519	51.4557
	U Shale	OMR007	5.129	0.226	3	14.3038	42.9114
	U Shale	OMR014	7.0159	0.21	2.5	13.2911	33.2278
	U Shale	OMR025	7.6263	0.265	1.5	16.7722	25.1582
	Silicilyte	OMR004	3.0131	0		0	0
	Silicilyte	OMR013	7.0189	0	2.5	0	0
	Silicilyte	OMR024	8.8211	0	1.5	0	0
	Silicilyte	OMR012	7.0085	0	1.5	0	0
	Silicilyte	OMR023	10.0012	0	2.5	0	0
	Thuleilat	OMR003	3.1861	0.538	1.5	34.0506	51.0759
	Thuleilat	OMR011	7.0083	0.422	2	26.7089	53.4177
	Thuleilat	OMR021	10.0029	0.666	3	42.1519	126.456
	Thuleilat	OMR022	5.6992	0.412	0.5	26.0759	13.038
	Table S1: Calculation of porphyrin concentrations from photospectrometric measurements at 574 nm. L=0.5 cm; ε (L.mmol-1.cm-1) = 31.60.

## Sheet: Table S2
	Well	Unit	Depth		δ15N	δ13C carb
					(‰ air)	(‰ VPDB)
	see Fike (2007)	A5	2846.6		1.7	2.9
			2847.8		1.6	3
			2849.2		1.8	2.9
			2850.5		2.9	3.3
			2851.7		1.8	4.4
			2853.3		1.8	3.2
			2854.8		3.3	3.2
			2856.6		2.5	3.1
			2858.5		3.1	3
	see Fike (2007)	A4	2905.8		3.7	-2.7
			2907.7		4.3	-2.4
			2908.7		4.3	-2.6
			2909.3		4.6	-2.6
			2910.8		4.5	-2.6
			2911.5		4.5	-2.7
			2919.3		4.4	-2.6
			2925.6		4.1	-2.4
			2928.8		4.8	-2.5
			2931.4		4.6	-2.8
			2932.1		5.3	-2.8
			2932.9		4	-2.8
			2937.1		4.5	-3.1
			2939.8		4.7	-3.1
			2940.1		4.9	-3.1
			2940.9		4.6	-3.2
			2944.7		6.2	-4.4
			2945.2		5.1	-3.9
			2949.9		9.4	-5
	Cambrian		2950		9.6	-4.5
	Ediacaran	A3	3030.8		2.3	3.2
			3031.3		3.6	3.3
			3032.3		1.2	3.2
			3032.8		3.7	3.4
			3034.5		2.4	3.3
	Table S2: Bulk stable carbon and nitrogen isotope values across the Ediacaran-Cambrian boundary. Data from Fike (2007).

## Sheet: Table S3
	Level		δ13C (‰ VPDB)
			MEM	MMM	MPM
	1		-26.2	-25.7	-17
	3		-26.2	-25.3	-16.8
	6		-25.9	-26.1	-17.3
	10		-29.8	-29.9	-16.9
	16		-30	-29.9	-17.4
	Table S3: Compound-specific stable carbon isotopic composition of maleimides in sediments of the Kupferschiefer, which was deposited under anoxic and euxinic conditions. Data (from Grice et al., 1997) was used in Figure 6.
